# Supplementary material
Source: Springer Nature journal article supplement (https://www.springermedizin.de/resource/supplementary/12967_2013_1678_MOESM7_ESM.pdf/9574632)

**A**

| Top molecules | Exp. <i>P</i> Value | <i>HUGO</i> gene name: function                                                        |
|---------------|---------------------|----------------------------------------------------------------------------------------|
| BCR           | 9,39E-12            | breakpoint cluster region: not clear                                                   |
| MIF           | 3,99E-09            | macrophage migration inhibitory factor: suppression of anti-inflammatory effects       |
| COMT          | 4,06E-08            | cartilage oligomeric matrix protein: noncollagenous extracellular matrix (ECM) protein |
| PRPF31        | 3,65E-07            | pre-mRNA processing factor 31 homolog: spliceosome complex activation                  |
| MCM5*         | 9,94E-07            | minichromosome maintenance complex component 5: initiation of DNA replication          |
| CDC45         | 2,44E-06            | cell division cycle 45 homolog: initiation of DNA replication                          |
| CDC42EP1      | 3,05E-06            | CDC42 effector protein (Rho GTPase binding) 1: actin cytoskeleton reorganization       |
| CNOT3         | 3,07E-06            | CCR4-NOT transcription complex, subunit 3: general transcription regulation complex    |
| UBE2S         | 1,10E-05            | ubiquitin-conjugating enzyme E2S:ubiquitin activating enzyme                           |

**B**

Chr 22

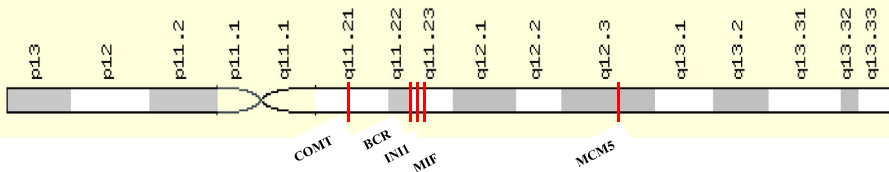

Supplement: MOESM7 [file 9574632]
